# Supplementary material
Source: Research Square preprint supplement (doi:10.21203/rs.3.rs-9377174/v1)
Supplement: Supplementary file 1 [file 175c2de62265f4247c1e107e.docx]

**Online Supplementary Material to: Comparing evidential value across established and emerging disease associations: A P-Curve and Z-curve analysis of Periodontal Disease literature**

Table S1 – MeSH Search string

|  | **PD-T2D** | **PD-CVD** | **PD-AD** |
| --- | --- | --- | --- |
| **Search string** | ("periodontal disease" OR periodontitis OR "chronic periodontitis" OR "gingival disease" OR "alveolar bone loss" OR "periodontal attachment loss")  AND  ("type 2 diabetes" OR "diabetes mellitus" OR "incident diabetes")  AND  ("prospective study" OR "prospective cohort" OR "cohort study" OR "longitudinal study" OR "randomized controlled trial" OR RCT OR "clinical trial") | ("periodontal disease" OR periodontitis OR "chronic periodontitis" OR "alveolar bone loss" OR "periodontal attachment loss")  AND  ("cardiovascular disease" OR CVD OR "coronary heart disease" OR "coronary artery disease" OR "myocardial infarction" OR stroke OR "cerebrovascular disease")  AND  ("incidence" OR "risk" OR "development" OR "progression")  AND  ("prospective study" OR "prospective cohort" OR "cohort study" OR "longitudinal study" OR "randomized controlled trial" OR RCT OR "clinical trial") | ("periodontal disease" OR periodontitis OR "chronic periodontitis" OR "alveolar bone loss" OR "periodontal attachment loss")  AND  ("dementia" OR "Alzheimer's disease" OR Alzheimer* OR "cognitive decline" OR "cognitive impairment")  AND  ("incidence" OR "risk" OR "development" OR "progression")  AND  ("prospective study" OR "prospective cohort" OR "cohort study" OR "longitudinal study" OR "randomized controlled trial" OR RCT OR "clinical trial") |

Table S2 – Full details of included studies and relevant variables

| **Disease arm** | **First author, Year** | **doi** | **Effect Estimate Type** | **Point Value Effect Estimate** | **CI** | **Calculated Z-statistic** | **Calculated Two-sided p-value** | **Notes** |
| --- | --- | --- | --- | --- | --- | --- | --- | --- |
| T2D | Lin et al. (2014) | 10.1902/jop.2013.13035 | HR | 1.19 | 1.10-1.29 | 4.280 | 0.0000 |  |
| T2D | Chiu et al. (2015) | 10.1007/s00592-014-0612-0 | HR | 1.33 | 1.09-1.63 | 2.778 | 0.0055 |  |
| T2D | Demmer et al. (2008) | 10.2337/dc08-0026. | OR | 1.71 | 1.19-2.45 | 2.912 | 0.0036 |  |
| T2D | Winning et al. (2017) | 0.1111/jcpe.12691 | HR | 1.69 | 1.06-2.69 | 2.209 | 0.0272 |  |
| T2D | Montero et al. (2023) | 10.1111/jcpe.13937 | OR | 4.90 | 2.24-10.72 | 3.979 | 0.001 |  |
| T2D | Myllymäki et al. (2018) | 10.1111/jcpe.13005 | RR | 1.02 | 1.00-1.04 | 1.979 | 0.0478 |  |
| T2D | Yoneda et al. (2025) | 10.1007/s13340-025-00815-z | HR | 1.43 | 1.09-1.89 | 2.547 | 0.0109 |  |
| T2D | Lee et al. (2020) | 10.3390/medicina56110575 | OR | 1.16 | 1.12-1.20 | 8.433 | 0.0000 |  |
| T2D | Zemedikun et al. (2021) | 10.1136/bmjopen-2020-048297 | HR | 1.26 | 1.21-1.32 | 10.412 | 0.0000 |  |
| CVD | Sen et al. (2018) | 10.1161/STROKEAHA.117.018990 | HR | 2.06 | 1.41-3.01 | 3.736 | 0.0002 | Used overall combined ischemic stroke measure |
| CVD | Rydén et al. (2016) | 10.1111/jcpe.12611 | OR | 1.28 | 1.03-1.60 | 2.197 | 0.0280 |  |
| CVD | Tiensripojamarn et al. (2020) | 10.1111/jcpe.13418 | HR | 4.53 | 1.08-19.02 | 2.064 | 0.0390 | CHD estimate used |
| CVD | Hsu et al. (2022) | 10.1097/JCMA.0000000000000797 | HR | 2.03 | 1.99-2.08 | 62.747 | 0.0000 |  |
| CVD | Park et al. (2025) | 10.1111/jcpe.14107 | HR | 1.06 | 1.01-1.11 | 2.419 | 0.0155 |  |
| CVD | Bengtsson et al. (2021) | 10.1007/s00784-020-03739-x | HR | 1.50 | 1.10-2.10 | 2.458 | 0.0140 |  |
| CVD | Larvin et al. (2024) | 10.1111/jcpe.14002 | HR | 1.38 | 1.16-1.64 | 3.646 | 0.0003 |  |
| CVD | Gomes et al. (2016) | 10.1111/icj.12468 | RR | 2.01 | 1.19-3.62 | 2.460 | 0.0139 |  |
| CVD | DeStefano et al. (1993) | 10.1136/bmj.306.6879.688 | RR | 1.25 | 1.06-1.48 | 2.621 | 0.0088 |  |
| CVD | Sen et al. (2013) | 10.1016/j.jstrokecerebrovasdis.2013.06.024 | HR | 2.80 | 1.20-6.50 | 2.389 | 0.0169 |  |
| CVD | Zemedikun et al. (2021) | 10.1136/bmjopen-2020-048296 | HR | 1.18 | 1.13-1.23 | 7.651 | 0.0000 | All cardiovascular disease variable used |
| CVD | Reichert et al. (2024) | 10.1111/jre.13365 | HR | 1.26 | 1.00-1.58 | 1.981 | 0.0476 |  |
| CVD | Hansen et al. (2016) | 10.1016/j.amjcard.2016.05.036 | RR | 1.55 | 1.47-1.65 | 14.872 | 0.0000 | MACE estimate used |
| CVD | Mucci et al. (2009) | 10.1093/aje/kwp177 | HR | 1.30 | 1.00-1.40 | 3.057 | 0.0022 |  |
| CVD | Yu et al. (2015) | 10.1111/jcpe.12335 | HR | 1.14 | 1.00-1.31 | 1.902 | 0.0572 | Not significant, used in Z-curve |
| AD | Demmer et al. (2020) | 10.1212/WNL.0000000000010312 | HR | 1.22 | 1.01-1.47 | 2.077 | 0.0378 |  |
| AD | Kim et al. (2020) | 10.5051/jpis.2000600030 | HR | 1.08 | 1.01-1.14 | 2.492 | 0.0127 | Back calculated value smaller than author's reported p = 0.022, Alzheimer dementia value used |
| AD | Lee et al. (2017) | 10.1111/jgs.14944 | HR | 1.14 | 1.04-1.24 | 2.920 | 0.0035 |  |
| AD | Yoo et al. (2023) | 10.1016/j.jamda.2023.08.011 | HR | 1.07 | 1.04-1.09 | 5.648 | 0.0000 | All-cause dementia estimate used |
